# Supplementary material
Source: PubMed Central journal article supplement (PMC503745)

Total SFC/10<sup>6</sup> PBL

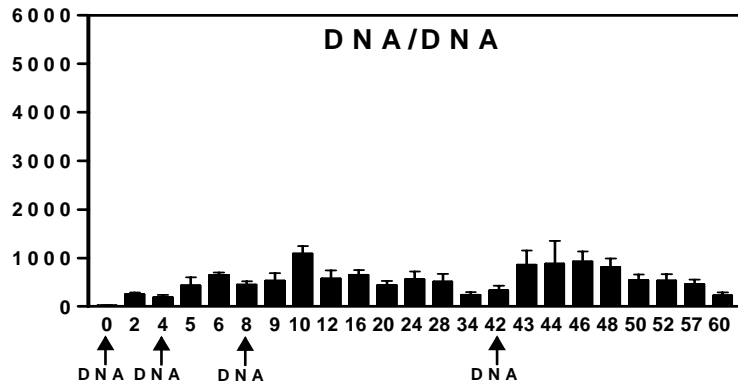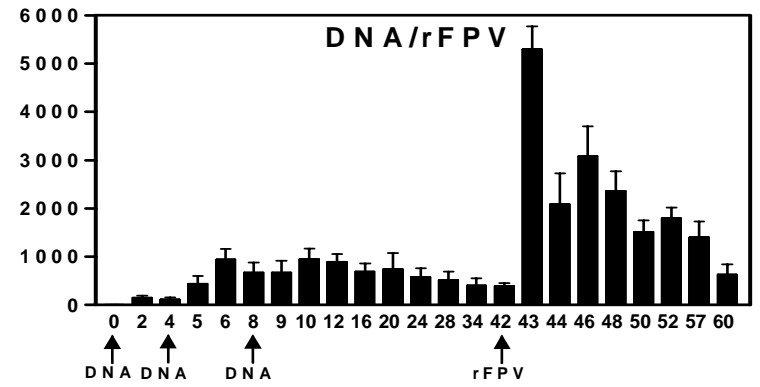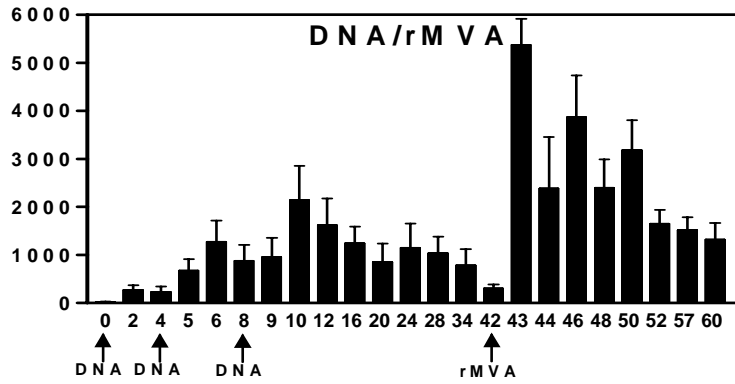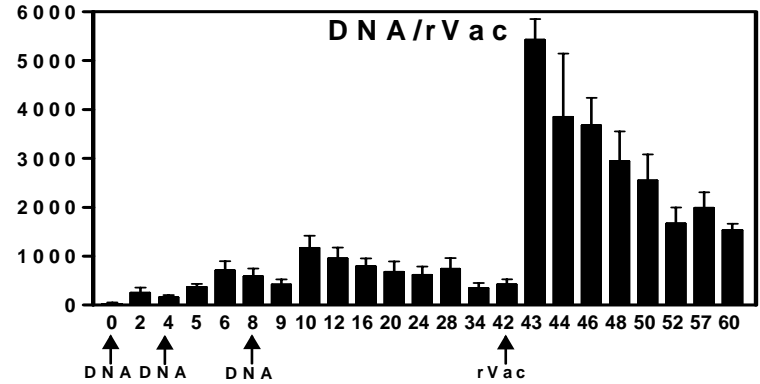

Weeks post-immunization

Supplement: pnas_101_30_11088__1.pdf [file pnas_101_30_11088__1.pdf]

Log copies of SIV RNA/ml

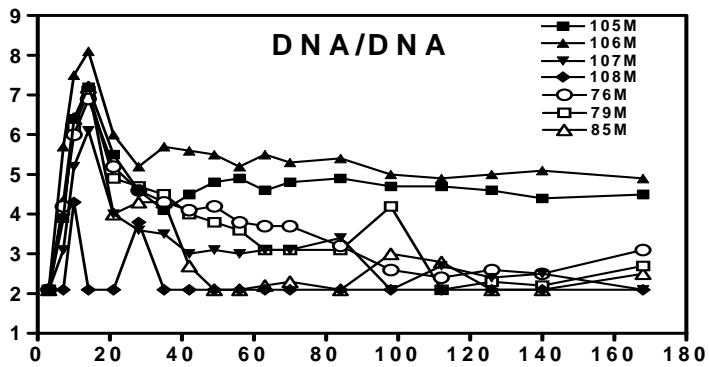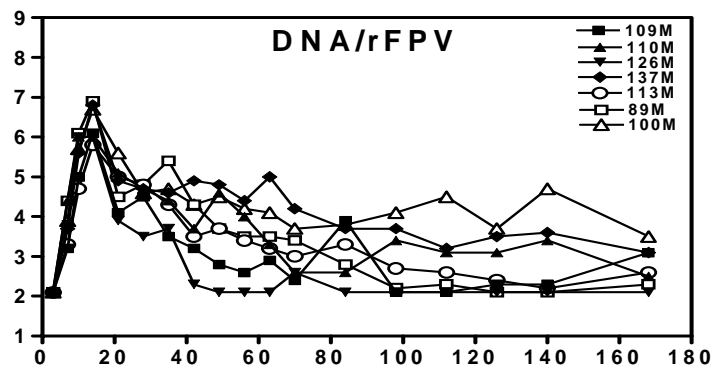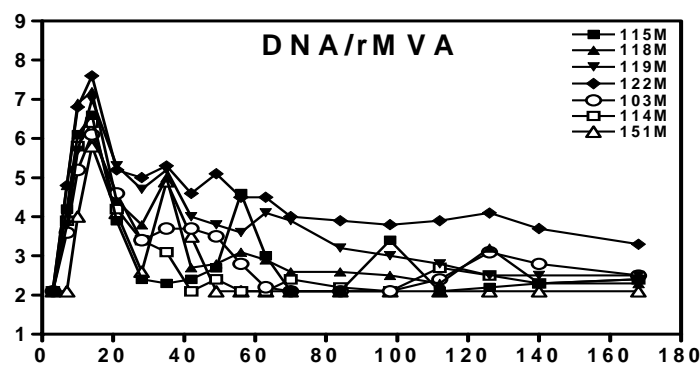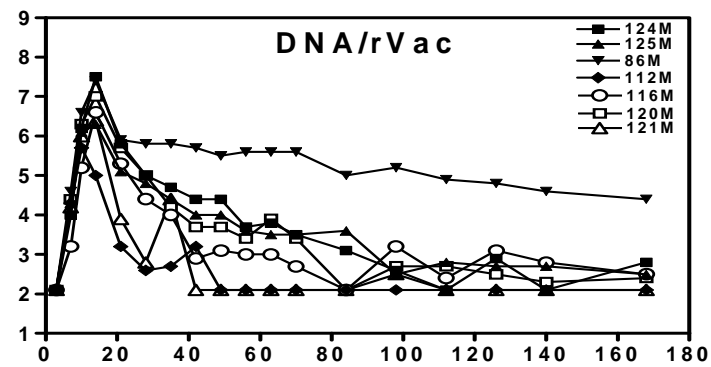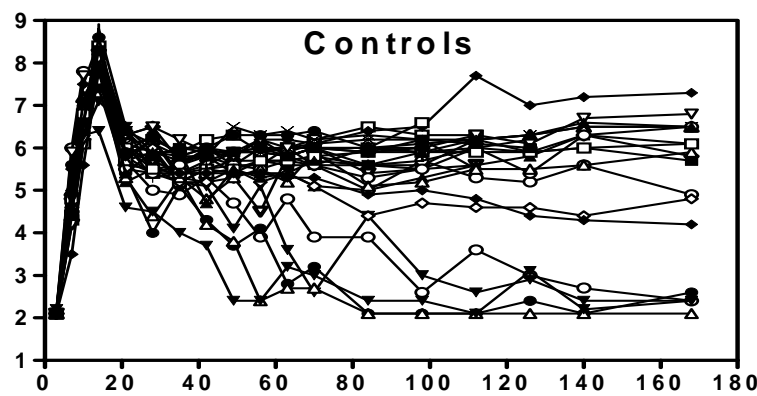

Days post-challenge

Supplement: pnas_101_30_11088__2.pdf [file pnas_101_30_11088__2.pdf]

**CD4+ T cells/ $\mu$ l**

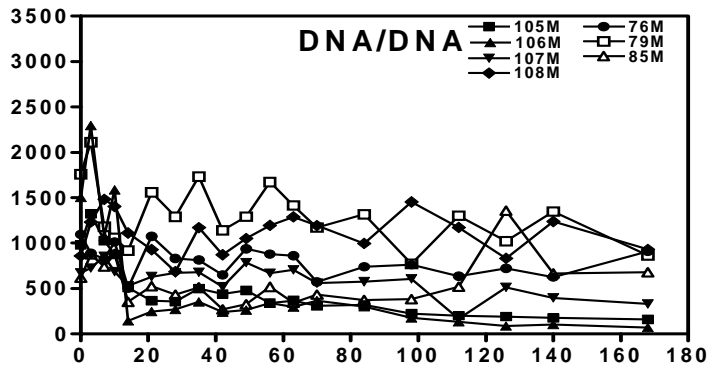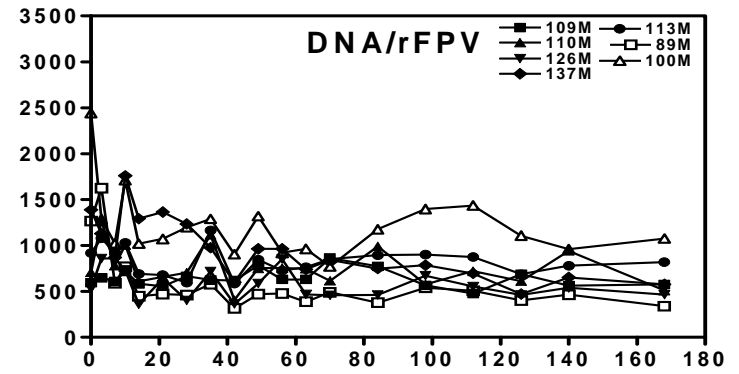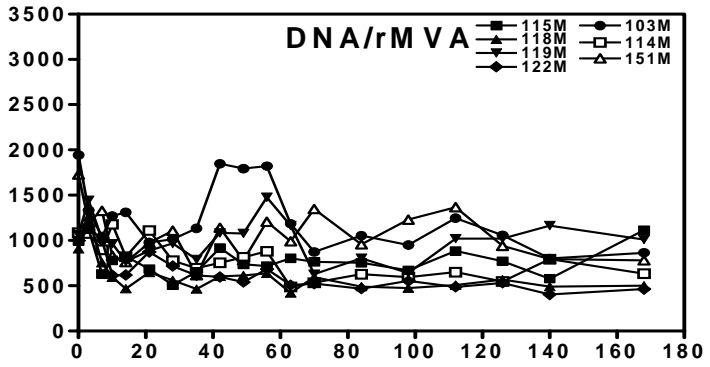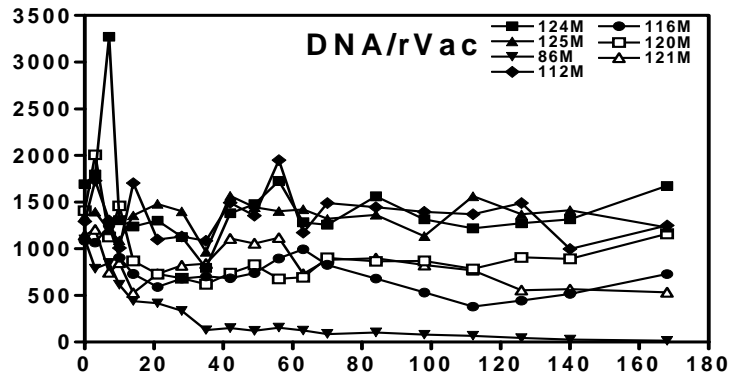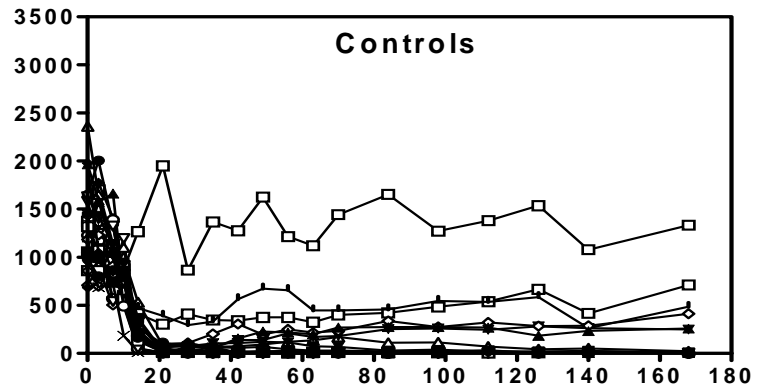

**Days post-challenge**

Supplement: pnas_101_30_11088__3.pdf [file pnas_101_30_11088__3.pdf]
